# Supplementary material for: Protection against dengue disease by synthetic nucleic acid antibody prophylaxis/immunotherapy
Source: PubMed Central journal article supplement (PMC4518257; doi:10.1038/srep12616), 2015-07-29
Supplement: srep12616-s1.pdf [file srep12616-s1.pdf]

## **Supplementary Figures**

### **Manuscript title:**

**Protection against dengue disease by synthetic nucleic acid antibody prophylaxis/immunotherapy**

### **Author List:**

**Seleeke Flingai<sup>1</sup>, Emily M. Plummer<sup>2</sup>, Ami Patel<sup>1</sup>, Sujan Shresta<sup>2</sup>, Janess M. Mendoza<sup>3</sup>, Kate E. Broderick<sup>3</sup>, Niranjan Y. Sardesai<sup>3</sup>, Kar Muthumani<sup>1</sup>, David B. Weiner<sup>1\*</sup>**

<sup>1</sup>Department of Pathology and Laboratory Medicine, Perelman School of Medicine at the University of Pennsylvania, Philadelphia, PA 19104, USA.

<sup>2</sup>Division of Vaccine Discovery, La Jolla Institute for Allergy and Immunology, 9420 Athena Circle, La Jolla, CA 92037, USA

<sup>3</sup>Inovio Pharmaceuticals Inc., Plymouth Meeting, PA 19462, USA

\*Corresponding author: David B. Weiner (dbweiner@mail.med.upenn.edu)

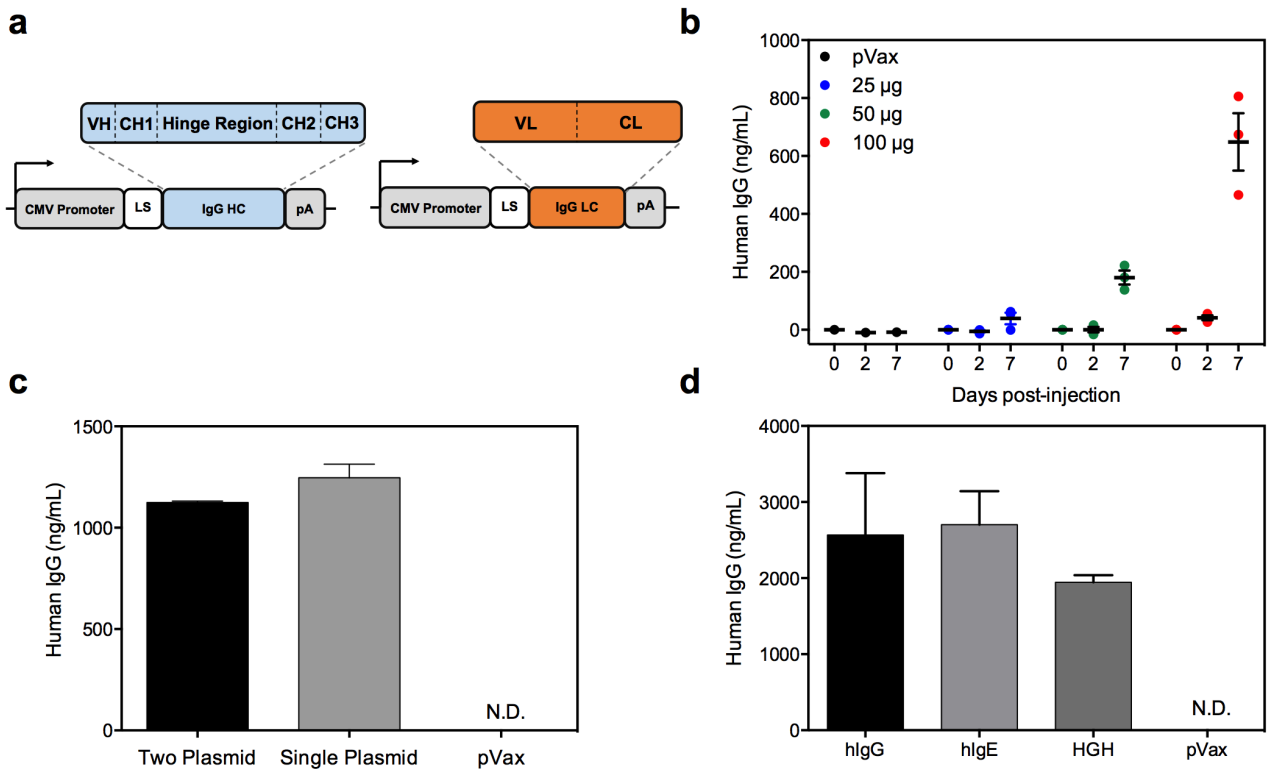

## Supplementary Figure 1 Development and optimization of DMAb

(a) Schematic illustration of initial two-plasmid DMAb delivery system; human IgG antibody heavy and light chain sequences were expressed on separate plasmids co-delivered either *in vitro* or *in vivo* in a single formulation.

(b) Dosage study for two-plasmid DMAb delivery of human IgG in C57B/6 mice measured by ELISA; DNA amounts indicate total DNA injected intramuscularly followed by EP (100  $\mu$ g = 50  $\mu$ g IgG heavy chain DNA + 50  $\mu$ g IgG light chain DNA; n = 3 mice per group).

(c) Comparison of human IgG levels *in vitro* by ELISA from two-plasmid DMAb or single plasmid DMAb (samples run in duplicate; data representative of two independent experiments).

(d) Comparison of human IgG levels *in vitro* by ELISA from single plasmid DMAb incorporating different human signal sequences fused to the IgG heavy and light chain genes (samples run in duplicate; data representative of three independent experiments).

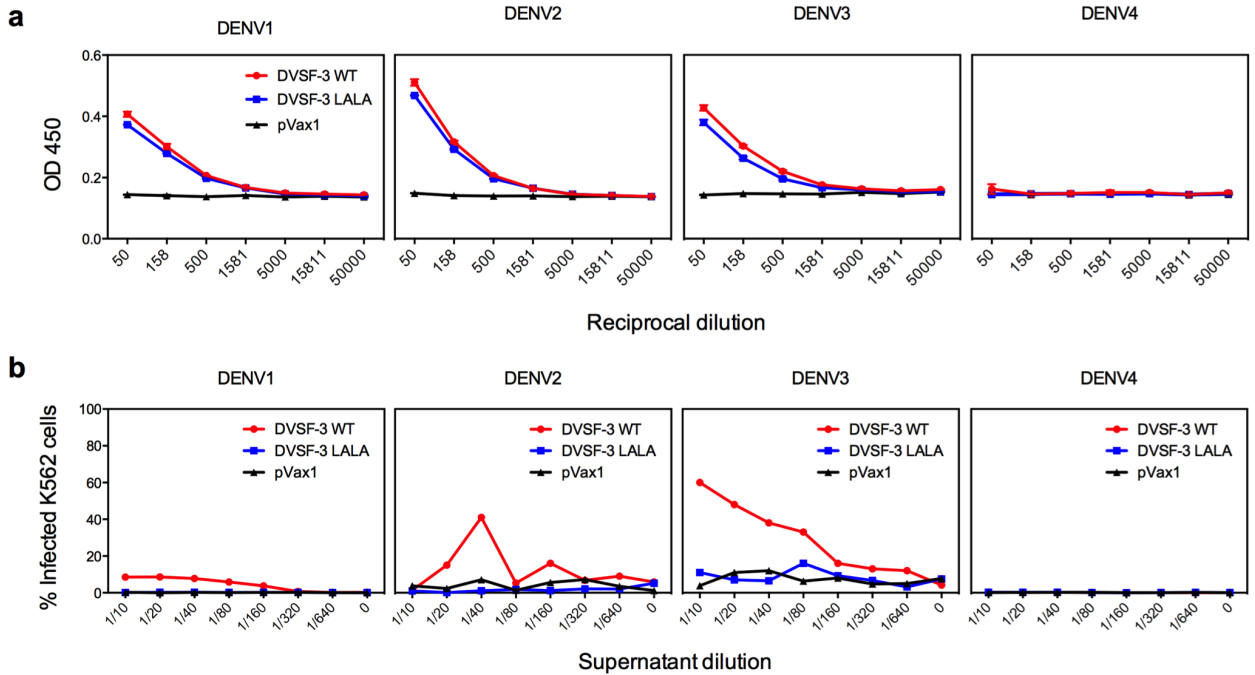

**Supplementary Figure 2** *In vitro* functional analysis of pDVSF-3 WT and LALA-encoded antibodies

(a) ELISA binding analysis of human IgG in supernatants of pDVSF-3 WT- or LALA-transfected 293T cells against purified recombinant DENV E proteins (samples run in duplicate; data representative of two independent experiments).

(b) Antibody-dependent enhancement were assessed by incubating DENV1, 2, 3, or 4 with serial dilutions of supernatants of pDVSF-3 WT- or LALA-transfected 293T cells before addition to K562 cells. The percentage of infected cells is shown (samples run in duplicate; data representative of two independent experiments).

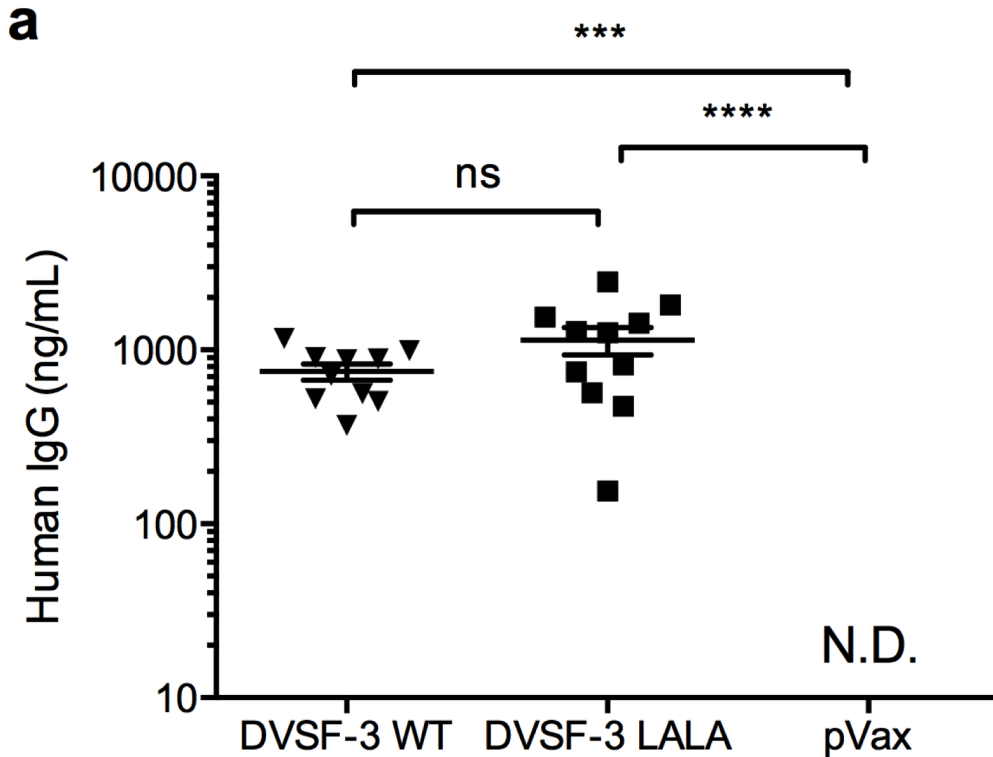

**Supplementary Figure 3** Pre-challenge levels of anti-DENV human IgG levels in AG129 mice after DMAb delivery

(a) Total human IgG of DVSF-3 WT or DVSF-3 LALA in serum was measured by ELISA 4 days after DNA intramuscular injection (one day before DENV2 challenge) and EP of respective plasmids in AG129 mice ( $n = 10-11$  mice per group;  $p \leq 0.0930$  for comparison between pDVSF-3 WT and pDVSF-3 LALA;  $p \leq 0.0005$  for comparison between pDVSF-3 WT and pVax;  $p \leq 0.0001$  for comparison between pDVSF-3 LALA and pVax).

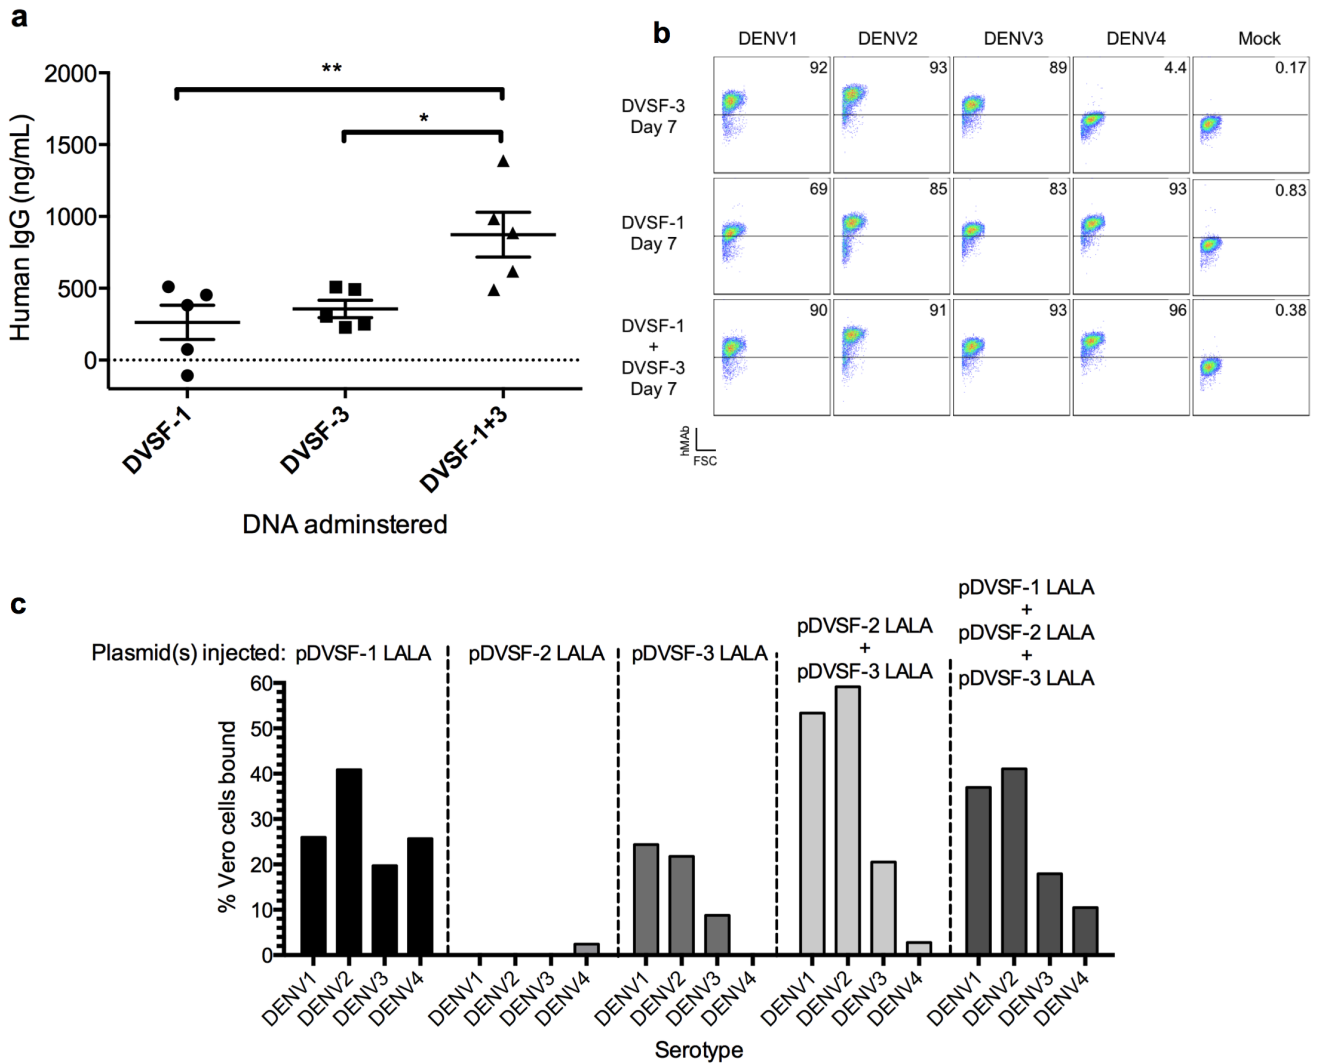

**Supplementary Figure 4** Delivery of multiple DENV antibody-encoding plasmids in mice produces increased DENV1-4 antisera

(a) Total human IgG of DVSF-3 WT, DVSF-1 WT, or DVSF-3 WT and DVSF-1 WT in serum was measured by ELISA 7 days after DNA intramuscular injection and EP of 100  $\mu$ g of respective plasmids in 129/Sv mice ( $n = 5$  mice per group;  $p \leq 0.0088$  for comparison between pDVSF-1 WT and pDVSF-1+3; error bars represent standard error of the mean;  $p \leq 0.0240$  for comparison between pDVSF-3 WT and pDVSF-1+3). (b) Vero cells were either uninfected (Mock) or infected by DENV1, 2, 3, or 4, then fixed, permeabilized, and stained with 129/Sv mouse serum taken at days 0 or 7 post-DNA injection of either pDVSF-3 WT (100  $\mu$ g), pDVSF-1 WT (100  $\mu$ g), or pDVSF-3 WT and pDVSF-1 WT (100  $\mu$ g of each in separate legs) ( $n = 5$  mice per group, representative of two independent experiments). (c) Bar graph representing the breadth of 129/Sv mouse serum staining of Vero cells infected with DENV1, 2, 3, or 4 after injection of single (pDVSF-1 LALA, pDVSF-2 LALA, or pDVSF-3 LALA) or multiple (pDVSF-2 LALA + pDVSF-3 LALA, or pDVSF-1 LALA + pDVSF-2 LALA + pDVSF-3 LALA) plasmids ( $n = 4$  mice per group; data representative all mice from each respective group)
